# Supplementary material
Source: PubMed Central journal article supplement (PMC2898371)

## FIGURE LEGENDS FOR SUPPLEMENTAL DATA

**Fig. S1.** Histological analysis of newborn *Prx1-Cre/Vcan*<sup>+/+</sup> (A,C) and *Prx1-Cre/Vcan*<sup>flox/flox</sup> (B,D) forelimbs by H&E staining. *Prx1-Cre/Vcan*<sup>+/+</sup> digits display joint tilting (arrowhead in B), and formation of hypertrophic chondrocyte nodule in proximal phalanges and delayed endochondral ossification (D). M, metacarpus; pp, proximal phalanges. Scale bars: (A,B) 100  $\mu$ m; (C,D) 25  $\mu$ m.

**Fig. S2.** Patterns of H&E, and beta-galactosidase staining of hindlimbs at E14.5. (A) Histological analysis of *Prx1-Cre/Vcan*<sup>+/+</sup> and *Prx1-Cre/Vcan*<sup>flox/flox</sup> hindlimbs by H&E staining. *Prx1-Cre/Vcan*<sup>+/+</sup> digits display horizontal stripes of the metatarsophalangeal joint interzones (a, and c as an enlarged image of the boxed area in a). Note no obvious differences between *Prx1-Cre/Vcan*<sup>+/+</sup> and *Prx1-Cre/Vcan*<sup>flox/flox</sup> (b, and d as an enlarged image of the boxed area in b) in the joint interzone, although there were no clear joint interzone stripes in *Prx1-Cre/Vcan*<sup>flox/flox</sup>, compared with *Prx1-Cre/Vcan*<sup>+/+</sup> embryos. Scale Bars: (a,b) 100  $\mu$ m; (c,d) 30  $\mu$ m. (B) Beta-galactosidase staining of *Prx1-Cre/R26R*. Scale Bars, 100  $\mu$ m, 80  $\mu$ m.

**Fig. S3.** Alcian blue staining of hindlimbs at E13.5. Patterns of both *Prx1-Cre/Vcan*<sup>+/+</sup> and *Prx1-Cre/Vcan*<sup>flox/flox</sup> are shown. Scale Bar: 100  $\mu$ m.

**Fig. S4.** Micromass at day 3. (A) An immunostaining pattern for versican at day 3 of *Prx1-Cre/Vcan*<sup>+/+</sup> micromass culture is shown. Scale Bar: 50  $\mu$ m (B) A pattern stained for beta-galactosidase of *Prx1-Cre/R26R* micromass culture is shown. Scale Bar: 120  $\mu$ m.

**Fig. S5.** Expression of CD44 and  $\beta$ -catenin. (A) Immunofluorescent staining patterns for CD44 of metatarsophalangeal joint at E18.5 of *Prx1-Cre/Vcan*<sup>+/+</sup> and *Prx1-Cre/Vcan*<sup>flox/flox</sup> are shown. Scale Bar: 40  $\mu$ m. (B) Immunostaining patterns for  $\beta$ -catenin of metatarsophalangeal joint at E15.5 of *Prx1-Cre/Vcan*<sup>+/+</sup> and *Prx1-Cre/Vcan*<sup>flox/flox</sup> are shown. Scale Bars: 100, 40  $\mu$ m.

**Fig. S6.** Western blot analysis of TGF- $\beta$  in micromass. Top panels represent Pro-TGF- $\beta$  together with actin. The graph shows the band density measured by Image J. The expression levels of TGF- $\beta$  of *Prx1-Cre/Vcan*<sup>flox/flox</sup> (n=3) standardized by actin are shown as percent of *Prx1-Cre/Vcan*<sup>+/+</sup>.

Figure S1

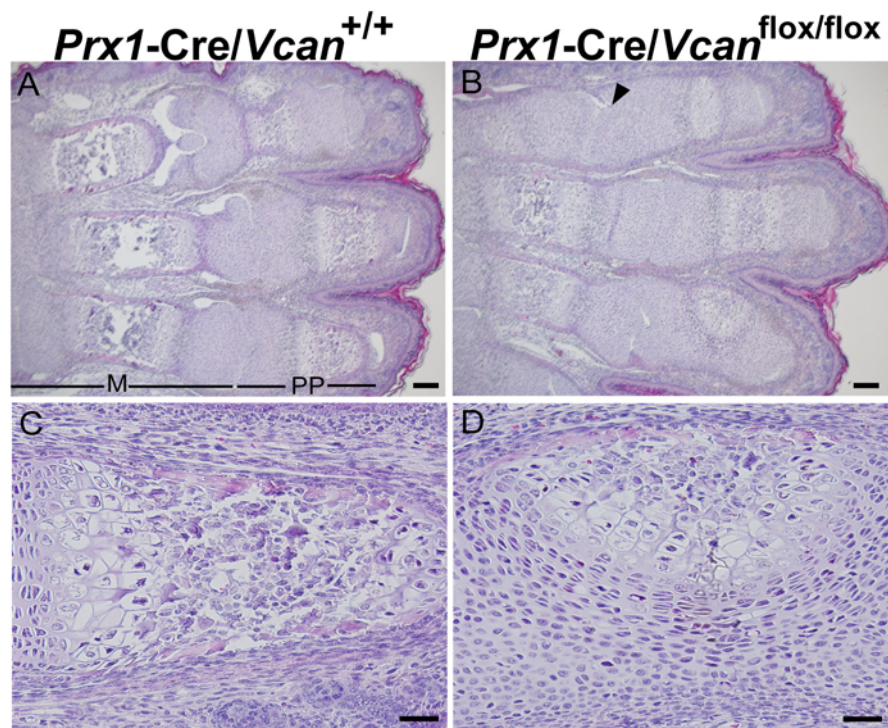

Figure S2

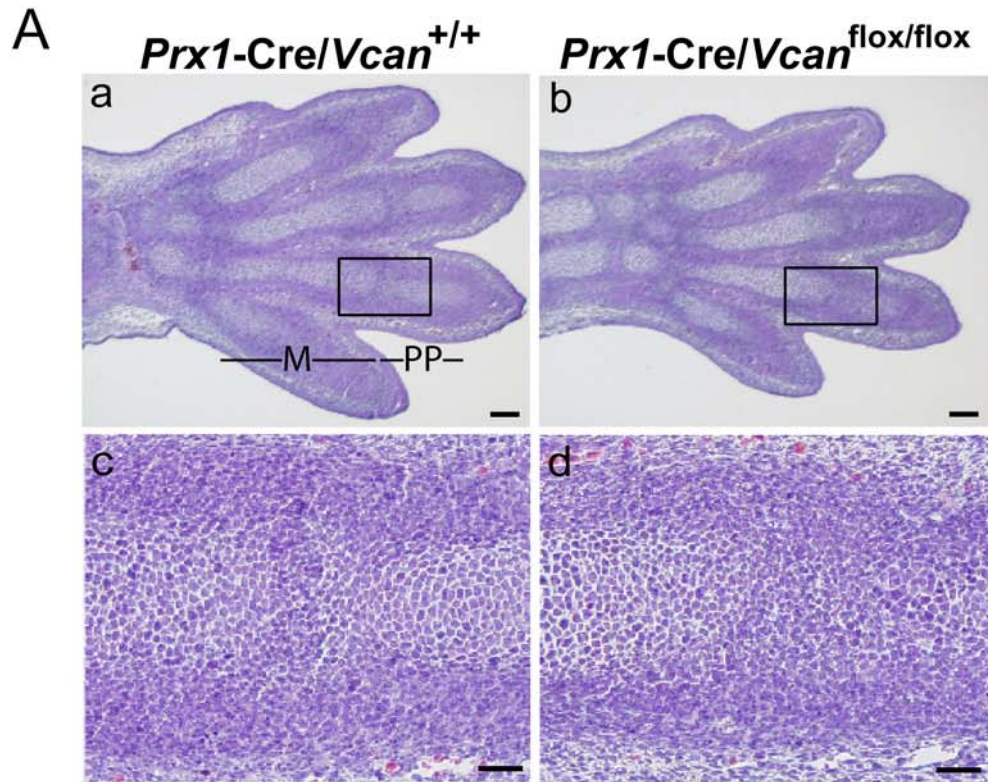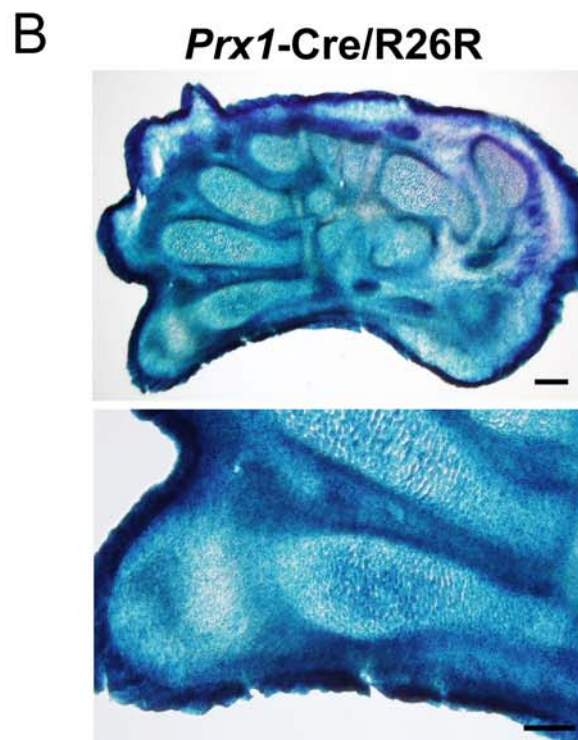

Figure S3

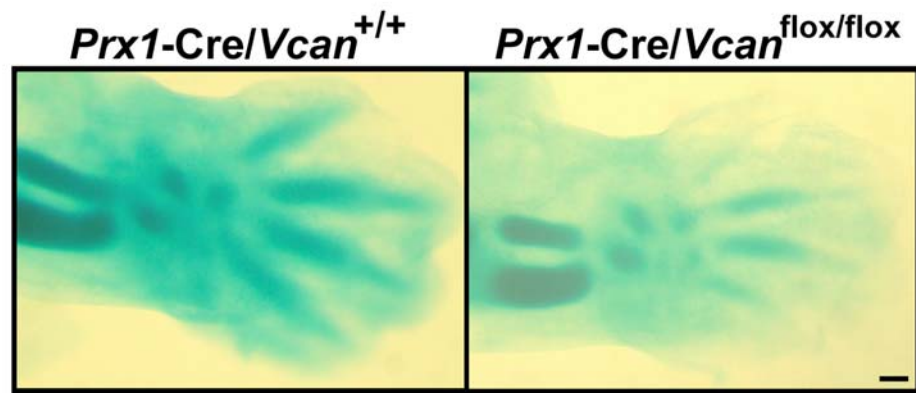

Figure S4

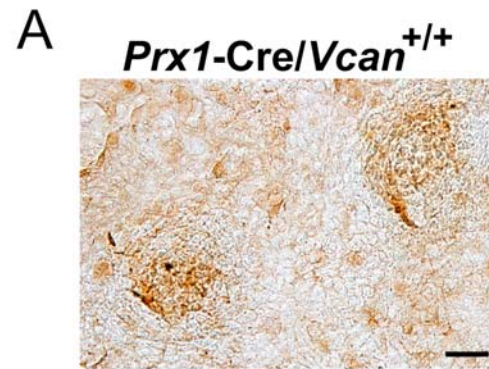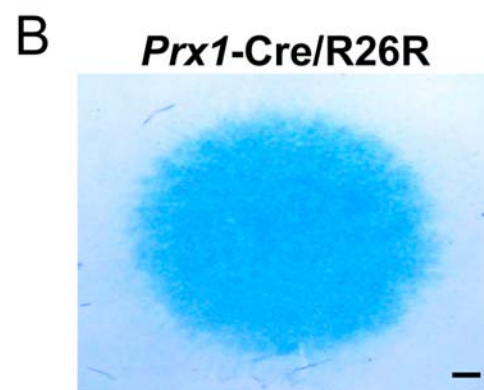

Figure S5

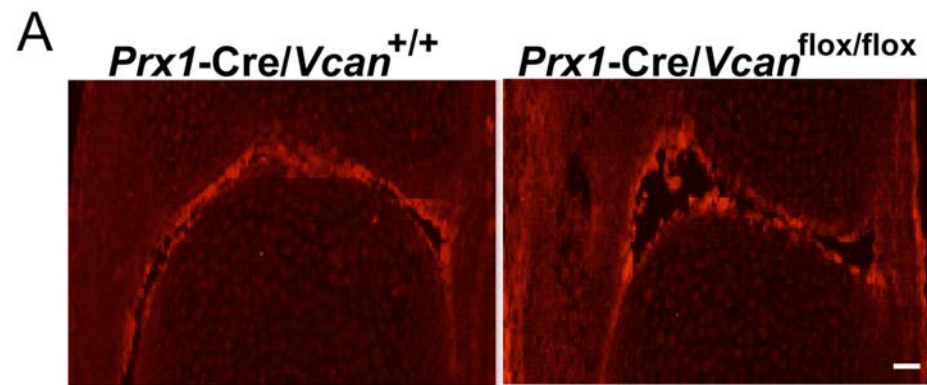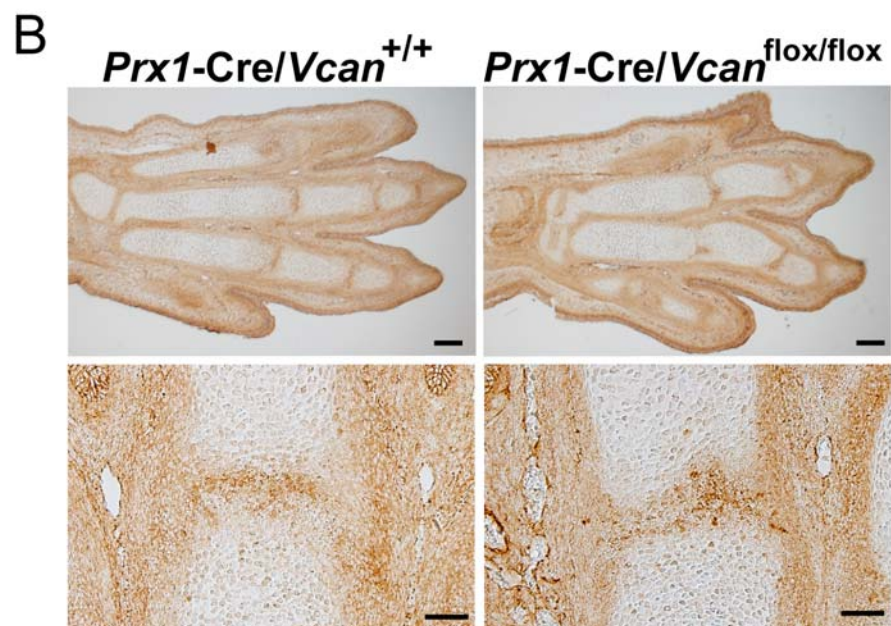

Figure S6

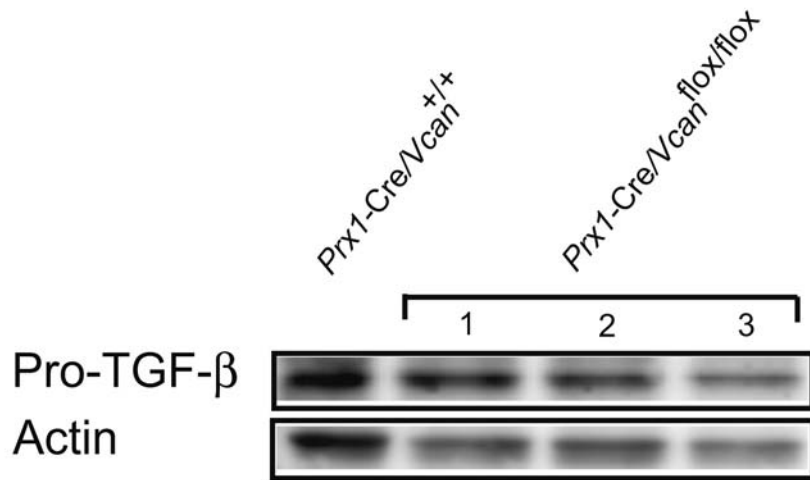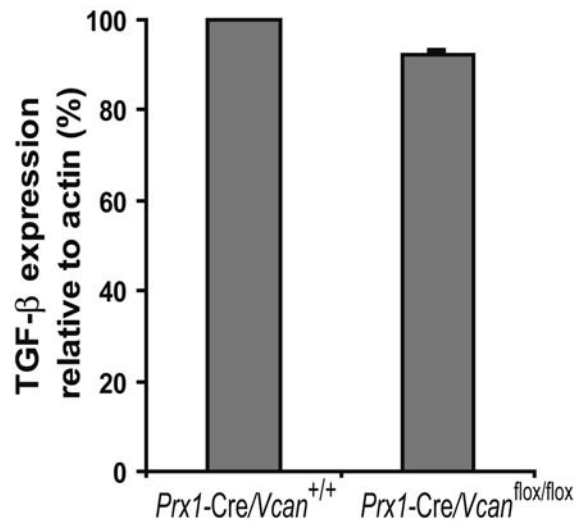

Supplement: supp_M109.096479_jbc.M109.096479-1.pdf [file supp_M109.096479_jbc.M109.096479-1.pdf]
